# Supplementary material for: Reagent-assisted hydrothermal synthesis of NiCo2O4nanomaterials as electrodes for high-performance asymmetric supercapacitors
Source: Royal Society of Chemistry journal article supplement (doi:10.1039/d1nj00268f), 2021-01-01
Supplement: d1nj00268f1.pdf [file d1nj00268f1.pdf]

# Reagents-assisted hydrothermal synthesis of NiCo<sub>2</sub>O<sub>4</sub> nanomaterials as electrode for high-performance asymmetric supercapacitor

Zhe Lu,<sup>a</sup> Dipan Xuan,<sup>a</sup> Dechao Wang,<sup>a</sup> Jie Liu,<sup>a</sup> Zhuang Wang,<sup>a</sup>  
Qian Liu,<sup>a</sup> Duo Wang,<sup>a</sup> Yueyuan Ye,<sup>a</sup> Zhifeng Zheng<sup>\*a,b</sup> and Shuirong Li<sup>\*a</sup>

<sup>a</sup> Fujian Provincial Industry Technologies Development Base for New Energy, Fujian Provincial Engineering and Research Center of Clean and High-valued Technologies for Biomass, Xiamen Key Laboratory for High-valued Conversion Technology of Agricultural Biomass, College of Energy, Xiamen University, Xiamen 361102, China

<sup>b</sup> China Fujian Innovation Laboratory of Energy Materials Science and Technology, Tan Kah Kee Innovation Laboratory, Xiamen University, Xiamen 361102, China

Corresponding author email: zhifeng.zheng@xmu.edu.cn, sli@xmu.edu.cn

Journal in which to be published: Journal of New Chemistry

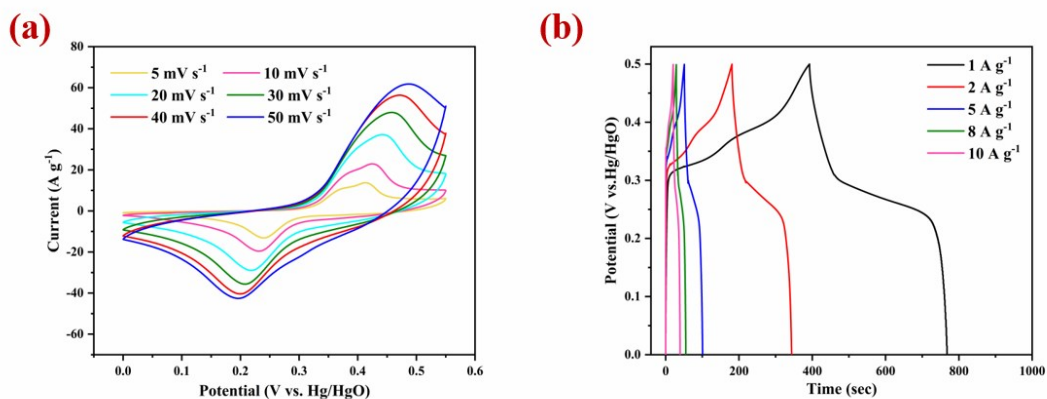

Fig. S1 (a) CV profiles of NCO electrode at different scan rates ranging from 5 to 50  $\text{mV s}^{-1}$ ;  
 (b) GCD curves of NCO electrode at different current densities.

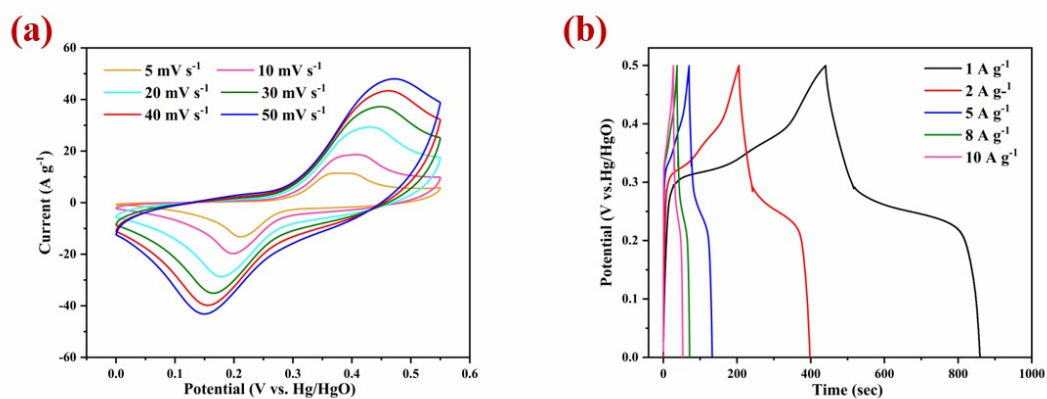

Fig. S2 (a) CV profiles of NCO-N electrode at different scan rates ranging from 5 to 50  $\text{mV s}^{-1}$ ;  
 (b) GCD curves of NCO-N electrode at different current densities.

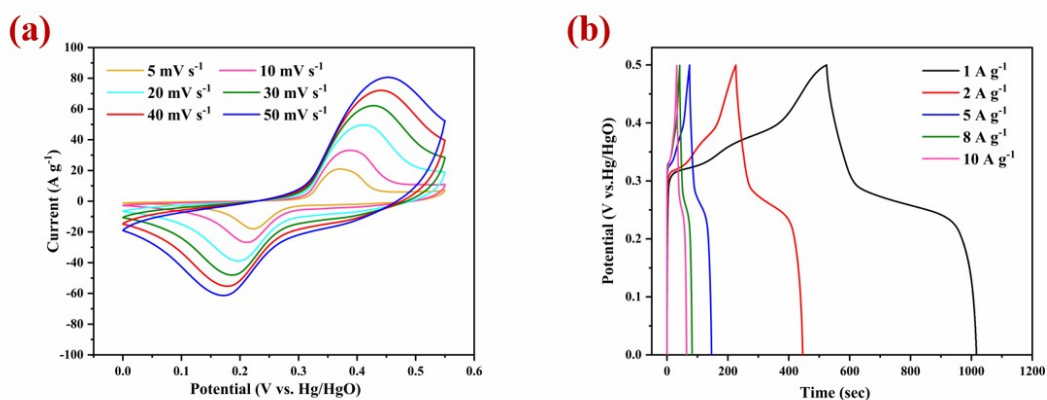

Fig. S3 (a) CV profiles of NCO-P electrode at different scan rates ranging from 5 to 50  $\text{mV s}^{-1}$ ;  
 (b) GCD curves of NCO-P electrode at different current densities.
